# Supplementary material for: Dissecting the role of non-coding RNAs in the accumulation of amyloid and tau neuropathologies in Alzheimer’s disease
Source: Mol Neurodegener. 2017 Jul 1;12:51. doi: 10.1186/s13024-017-0191-y (PMC5494142; doi:10.1186/s13024-017-0191-y)
Supplement: Supplementary file 2 — A table to assess whether the various demographic and neuro-pathological variables may be confounding the relationship between miRNA expression and pathological AD. A linear model is used to model miRNA expression by Study, Age at death, Sex, neuronal proportion (NNLS), post-mortem interval (PMI), RNA Integrity number (RIN) and pathological AD. The effect of pathological AD on the miRNA is reported (coef.AD) as well as the probability of observing this effect or something more extreme assuming that it should be zero (pval.AD). Then for each of the covariates a model is fit without including this covariate in the model and the effect of AD on miRNA expression is calculated again; e.g. pval.AD (−Age) is from the model not including Age at death. (CSV 28 kb) [file 13024_2017_191_MOESM2_ESM.csv]

	coefAD	pvalAD	coefAD(-Age)	pvalAD(-Age)	coefAD(-Sex)	pvalAD(-Sex)	coefAD(-NNLS)	pvalAD(-NNLS)	coefAD(-PMI)	pvalAD(-PMI)	coefAD(-RIN)	pvalAD(-RIN)	coefAD(-All)	pvalAD(-All)
miR-132	-0.26	2.00E-08	-0.27	4.20E-09	-0.26	2.30E-08	-0.27	5.00E-09	-0.26	2.40E-08	-0.3	8.90E-10	-0.32	4.00E-12
miR-129-5p	-0.11	3.90E-06	-0.099	3.20E-05	-0.11	4.00E-06	-0.11	9.90E-06	-0.11	4.30E-06	-0.13	3.60E-07	-0.12	6.50E-07
miR-1260	0.15	0.016	0.11	0.056	0.15	0.014	0.15	0.01	0.15	0.012	0.31	0.00021	0.32	8.70E-05
miR-200a	0.11	0.018	0.081	0.064	0.11	0.017	0.11	0.014	0.11	0.017	0.19	0.00052	0.2	0.00013
miR-34c-5p	-0.092	0.0019	-0.088	0.0025	-0.093	0.0018	-0.096	0.00093	-0.091	0.0023	-0.096	0.0012	-0.092	0.00078
miR-129-3p	-0.095	0.0013	-0.084	0.0037	-0.093	0.0016	-0.087	0.0028	-0.094	0.0016	-0.11	3.00E-04	-0.095	0.00098
miR-744	0.061	0.1	0.055	0.13	0.061	0.1	0.068	0.064	0.063	0.094	0.12	0.0048	0.14	0.0011
ebv-miR-BART8	-0.1	0.033	-0.11	0.02	-0.1	0.032	-0.11	0.018	-0.1	0.03	-0.1	0.026	-0.14	0.0017
miR-504	-0.045	0.066	-0.043	0.068	-0.045	0.062	-0.038	0.11	-0.045	0.068	-0.078	0.0043	-0.08	0.0019
miR-99b	0.081	0.0034	0.085	0.0016	0.08	0.004	0.086	0.0014	0.08	0.0039	0.079	0.0042	0.078	0.0023
miR-874	0.062	0.076	0.047	0.16	0.063	0.069	0.06	0.08	0.061	0.08	0.12	0.0022	0.12	0.0026
miR-1275	0.059	0.14	0.05	0.2	0.061	0.13	0.061	0.12	0.06	0.13	0.11	0.013	0.13	0.0026
miR-193b	0.05	0.11	0.036	0.23	0.051	0.1	0.054	0.076	0.05	0.1	0.088	0.0089	0.094	0.0031
miR-431	-0.092	0.0047	-0.086	0.0065	-0.093	0.0043	-0.084	0.0083	-0.091	0.0049	-0.1	0.0013	-0.09	0.0031
miR-133b	-0.067	0.063	-0.058	0.095	-0.067	0.06	-0.077	0.027	-0.069	0.053	-0.084	0.021	-0.1	0.0034
miR-30e	0.073	0.0048	0.061	0.015	0.074	0.0042	0.075	0.0029	0.07	0.0063	0.079	0.0022	0.069	0.0043
miR-1912	-0.078	0.011	-0.08	0.0073	-0.079	0.01	-0.071	0.018	-0.078	0.01	-0.077	0.011	-0.081	0.0044
miR-185	0.077	0.013	0.085	0.0046	0.077	0.013	0.074	0.016	0.077	0.012	0.074	0.016	0.082	0.0044
ebv-miR-BART5	-0.09	0.0071	-0.076	0.02	-0.09	0.007	-0.1	0.002	-0.091	0.0064	-0.088	0.0077	-0.088	0.0045
miR-656	0.064	0.0068	0.068	0.003	0.066	0.0056	0.069	0.0032	0.067	0.0048	0.054	0.023	0.063	0.0047
miR-517c_miR-519a	0.078	0.0099	0.072	0.015	0.079	0.009	0.075	0.012	0.078	0.011	0.086	0.0044	0.079	0.0058
miR-96	-0.063	0.0045	-0.059	0.0061	-0.064	0.004	-0.062	0.0044	-0.063	0.004	-0.062	0.005	-0.056	0.0062
miR-633	-0.093	0.12	-0.078	0.18	-0.096	0.11	-0.11	0.052	-0.094	0.12	-0.14	0.027	-0.16	0.0065
miR-100	0.055	0.011	0.055	0.0094	0.053	0.015	0.049	0.02	0.055	0.011	0.064	0.0035	0.054	0.0083
miR-199a-5p	0.069	0.048	0.072	0.035	0.069	0.049	0.069	0.043	0.073	0.039	0.067	0.056	0.085	0.0085
miR-23b	-0.02	0.36	-0.023	0.27	-0.021	0.33	-0.019	0.37	-0.019	0.39	-0.034	0.13	-0.055	0.0091
miR-149	0.074	0.041	0.073	0.039	0.073	0.043	0.078	0.027	0.072	0.044	0.09	0.013	0.088	0.0092
miR-376a	0.05	0.11	0.054	0.075	0.052	0.094	0.065	0.033	0.052	0.091	0.052	0.096	0.073	0.012
miR-433	-0.044	0.13	-0.033	0.25	-0.044	0.13	-0.04	0.17	-0.042	0.15	-0.079	0.013	-0.075	0.013
miR-376c	0.047	0.12	0.048	0.11	0.049	0.11	0.056	0.064	0.049	0.11	0.053	0.085	0.07	0.015
miR-216a	0.09	0.026	0.093	0.018	0.089	0.027	0.095	0.017	0.092	0.022	0.084	0.037	0.09	0.018
miR-29b	0.029	0.34	0.037	0.22	0.031	0.32	0.04	0.19	0.032	0.3	0.041	0.19	0.068	0.019
miR-424	0.046	0.15	0.037	0.23	0.046	0.15	0.042	0.18	0.044	0.17	0.073	0.028	0.073	0.02
miR-195	0.074	0.0078	0.066	0.015	0.074	0.0078	0.075	0.0058	0.075	0.007	0.067	0.016	0.06	0.022
miR-381	0.056	0.12	0.058	0.091	0.057	0.11	0.069	0.048	0.059	0.097	0.051	0.14	0.075	0.022
miR-335	0.062	0.032	0.062	0.028	0.062	0.031	0.064	0.024	0.062	0.03	0.048	0.097	0.062	0.023
miR-873	0.056	0.04	0.052	0.053	0.054	0.048	0.062	0.019	0.058	0.034	0.052	0.058	0.057	0.024
miR-137	0.062	0.073	0.055	0.1	0.062	0.069	0.073	0.032	0.062	0.07	0.061	0.073	0.072	0.025
miR-34a	0.045	0.18	0.073	0.026	0.047	0.16	0.049	0.13	0.047	0.16	0.044	0.19	0.069	0.028
miR-410	-0.068	0.07	-0.064	0.078	-0.068	0.071	-0.07	0.057	-0.065	0.082	-0.079	0.034	-0.077	0.028
miR-25	0.051	0.061	0.047	0.078	0.051	0.062	0.037	0.16	0.049	0.071	0.064	0.021	0.057	0.028
miR-194	0.047	0.17	0.048	0.15	0.048	0.17	0.061	0.072	0.047	0.17	0.051	0.14	0.071	0.03
miR-497	0.055	0.04	0.054	0.036	0.054	0.04	0.052	0.048	0.056	0.036	0.057	0.03	0.053	0.032
miR-19b	0.052	0.064	0.039	0.15	0.053	0.058	0.059	0.031	0.05	0.072	0.054	0.052	0.055	0.032
let-7i	-0.041	0.045	-0.042	0.035	-0.04	0.046	-0.041	0.039	-0.04	0.045	-0.042	0.038	-0.039	0.036
miR-484	-0.034	0.26	-0.034	0.25	-0.035	0.24	-0.035	0.22	-0.033	0.27	-0.048	0.11	-0.058	0.037
miR-127-3p	0.056	0.13	0.068	0.061	0.056	0.13	0.06	0.098	0.055	0.14	0.062	0.092	0.071	0.041
miR-379	0.025	0.19	0.042	0.027	0.025	0.19	0.035	0.069	0.026	0.18	0.017	0.37	0.037	0.046
miR-548g	-0.058	0.086	-0.053	0.11	-0.057	0.088	-0.063	0.055	-0.059	0.079	-0.054	0.11	-0.06	0.055
miR-1180	-0.036	0.12	-0.041	0.07	-0.037	0.11	-0.033	0.14	-0.036	0.12	-0.038	0.099	-0.041	0.056
miR-548a-3p	-0.064	0.052	-0.059	0.065	-0.064	0.05	-0.071	0.026	-0.064	0.049	-0.058	0.075	-0.058	0.057
miR-320a	0.042	0.16	0.035	0.23	0.041	0.16	0.037	0.21	0.043	0.15	0.067	0.029	0.055	0.057
miR-192	0.018	0.32	0.022	0.21	0.018	0.32	0.016	0.37	0.018	0.31	0.029	0.11	0.031	0.068
miR-485-5p	-0.031	0.29	-0.025	0.39	-0.031	0.3	-0.026	0.37	-0.032	0.28	-0.052	0.085	-0.052	0.07
miR-454	0.058	0.034	0.05	0.063	0.058	0.035	0.059	0.029	0.06	0.029	0.055	0.043	0.045	0.076
let-7d	-0.024	0.2	-0.021	0.25	-0.025	0.19	-0.022	0.22	-0.024	0.19	-0.039	0.046	-0.032	0.076
miR-203	-0.047	0.12	-0.059	0.045	-0.046	0.13	-0.043	0.15	-0.047	0.12	-0.043	0.15	-0.05	0.077
miR-450b-5p	-0.055	0.088	-0.043	0.18	-0.056	0.081	-0.065	0.04	-0.057	0.078	-0.053	0.1	-0.053	0.078
miR-126	-0.041	0.16	-0.05	0.081	-0.039	0.19	-0.042	0.14	-0.042	0.15	-0.047	0.11	-0.048	0.079
miR-181b_miR-181d	-0.014	0.52	-0.027	0.21	-0.016	0.47	-0.016	0.47	-0.014	0.52	-0.0068	0.76	-0.037	0.082
miR-29a	0.029	0.25	0.039	0.11	0.029	0.25	0.037	0.13	0.03	0.24	0.019	0.45	0.041	0.082
miR-145	-0.04	0.26	-0.036	0.29	-0.039	0.26	-0.037	0.27	-0.04	0.25	-0.057	0.11	-0.057	0.084
hsv1-miR-H3	0.032	0.33	0.013	0.69	0.033	0.33	0.032	0.33	0.03	0.37	0.056	0.11	0.056	0.085
miR-518f	-0.072	0.026	-0.062	0.05	-0.071	0.027	-0.074	0.018	-0.072	0.026	-0.063	0.049	-0.05	0.089
miR-186	0.049	0.1	0.043	0.15	0.048	0.11	0.05	0.094	0.049	0.11	0.054	0.071	0.048	0.091
miR-218	0.071	0.055	0.061	0.095	0.073	0.051	0.068	0.062	0.069	0.067	0.062	0.094	0.058	0.093
miR-2117	-0.0074	0.86	-0.0017	0.97	-0.0071	0.86	-0.015	0.71	-0.014	0.74	0.069	0.15	0.082	0.097
miR-99a	0.028	0.22	0.029	0.2	0.028	0.23	0.031	0.18	0.028	0.22	0.029	0.22	0.036	0.1
miR-92a	-0.0016	0.95	-0.00025	0.99	-0.0031	0.9	-0.0089	0.72	-0.0026	0.92	-0.02	0.43	-0.04	0.1
miR-142-5p	-0.036	0.097	-0.03	0.15	-0.036	0.096	-0.033	0.11	-0.036	0.091	-0.041	0.058	-0.033	0.1
miR-432	-0.038	0.12	-0.033	0.17	-0.038	0.12	-0.042	0.078	-0.036	0.14	-0.035	0.15	-0.036	0.1
miR-520e	0.029	0.52	0.034	0.44	0.03	0.51	0.03	0.5	0.029	0.53	0.049	0.28	0.07	0.1
miR-375	-0.031	0.35	-0.042	0.2	-0.03	0.36	-0.034	0.3	-0.031	0.35	-0.044	0.19	-0.049	0.11
miR-592	-0.029	0.12	-0.021	0.25	-0.03	0.1	-0.026	0.14	-0.027	0.14	-0.036	0.054	-0.027	0.11
miR-598	-0.026	0.2	-0.025	0.19	-0.025	0.21	-0.024	0.22	-0.026	0.19	-0.032	0.11	-0.03	0.11
miR-425	0.028	0.29	0.036	0.17	0.028	0.29	0.034	0.19	0.027	0.31	0.025	0.34	0.039	0.11
miR-16	0.033	0.21	0.034	0.18	0.034	0.19	0.035	0.16	0.033	0.2	0.032	0.22	0.037	0.12
miR-130b	0.055	0.049	0.036	0.18	0.057	0.043	0.055	0.043	0.057	0.04	0.054	0.052	0.04	0.12
miR-301a	-0.039	0.088	-0.031	0.16	-0.04	0.086	-0.034	0.13	-0.039	0.087	-0.048	0.037	-0.033	0.13
miR-766	-0.032	0.29	-0.027	0.36	-0.033	0.27	-0.031	0.29	-0.032	0.29	-0.041	0.18	-0.042	0.13
let-7c	0.028	0.34	0.034	0.23	0.027	0.34	0.03	0.29	0.029	0.32	0.027	0.35	0.041	0.13
miR-106b	0.036	0.15	0.036	0.13	0.036	0.15	0.032	0.18	0.036	0.15	0.037	0.13	0.034	0.13
miR-584	-0.044	0.17	-0.042	0.18	-0.046	0.16	-0.042	0.18	-0.045	0.16	-0.04	0.21	-0.045	0.13
miR-342-3p	-0.033	0.12	-0.038	0.065	-0.034	0.11	-0.031	0.13	-0.033	0.12	-0.032	0.13	-0.029	0.13
miR-346	-0.029	0.4	-0.037	0.27	-0.03	0.38	-0.024	0.47	-0.029	0.39	-0.038	0.27	-0.047	0.14
miR-330-3p	0.055	0.14	0.06	0.098	0.052	0.17	0.059	0.11	0.055	0.14	0.048	0.2	0.051	0.14
miR-376b	0.055	0.098	0.04	0.23	0.057	0.09	0.052	0.11	0.056	0.092	0.054	0.1	0.045	0.14
miR-590-5p	0.011	0.59	0.011	0.61	0.012	0.57	0.011	0.6	0.0095	0.65	0.026	0.22	0.03	0.14
miR-24	-0.016	0.48	-0.014	0.53	-0.016	0.49	-0.013	0.57	-0.015	0.5	-0.029	0.23	-0.032	0.14
miR-101	0.033	0.3	0.025	0.42	0.036	0.27	0.043	0.17	0.033	0.3	0.033	0.29	0.043	0.15
miR-1537	-0.05	0.12	-0.052	0.097	-0.05	0.12	-0.05	0.11	-0.052	0.11	-0.044	0.18	-0.042	0.15
miR-494	0.028	0.38	0.034	0.28	0.028	0.38	0.015	0.64	0.025	0.44	0.05	0.13	0.045	0.16
miR-885-5p	-0.024	0.45	-0.018	0.56	-0.024	0.45	-0.021	0.49	-0.021	0.51	-0.045	0.17	-0.043	0.16
miR-138	0.034	0.23	0.033	0.23	0.033	0.24	0.039	0.17	0.035	0.22	0.046	0.11	0.038	0.16
miR-1299	0.0077	0.86	0.0015	0.97	0.011	0.8	0.0061	0.88	0.0051	0.91	0.041	0.36	0.061	0.16
miR-1206	-0.047	0.15	-0.039	0.22	-0.048	0.15	-0.046	0.15	-0.048	0.15	-0.048	0.15	-0.043	0.16
miR-1297	-0.04	0.21	-0.044	0.16	-0.041	0.21	-0.041	0.2	-0.041	0.2	-0.034	0.3	-0.042	0.16
miR-221	-0.032	0.2	-0.025	0.29	-0.031	0.21	-0.029	0.23	-0.03	0.23	-0.045	0.074	-0.032	0.17
miR-2114	-0.045	0.2	-0.043	0.22	-0.046	0.2	-0.054	0.12	-0.043	0.22	-0.044	0.21	-0.045	0.17
miR-579	0.028	0.44	0.042	0.22	0.029	0.41	0.031	0.37	0.028	0.43	0.029	0.4	0.045	0.17
miR-206	-0.04	0.17	-0.034	0.23	-0.042	0.16	-0.04	0.17	-0.042	0.15	-0.029	0.32	-0.037	0.18
miR-582-5p	-0.023	0.35	-0.024	0.32	-0.023	0.35	-0.023	0.34	-0.02	0.4	-0.032	0.18	-0.031	0.18
miR-509-3p	0.046	0.21	0.036	0.32	0.047	0.21	0.041	0.26	0.046	0.21	0.047	0.2	0.046	0.18
miR-664	0.015	0.41	0.027	0.13	0.015	0.43	0.016	0.36	0.016	0.39	0.016	0.39	0.023	0.18
miR-23a	0.044	0.07	0.037	0.12	0.044	0.072	0.038	0.11	0.043	0.074	0.04	0.098	0.03	0.18
miR-33a	0.041	0.23	0.053	0.11	0.04	0.25	0.049	0.15	0.039	0.25	0.027	0.43	0.043	0.18
miR-187	-0.033	0.27	-0.035	0.24	-0.032	0.28	-0.032	0.27	-0.032	0.29	-0.042	0.16	-0.037	0.19
miR-595	0.019	0.48	0.022	0.42	0.021	0.44	0.021	0.43	0.019	0.49	0.021	0.44	0.034	0.19
miR-1246	0.012	0.83	0.012	0.84	0.014	0.82	-0.012	0.84	0.0062	0.92	0.1	0.12	0.084	0.19
miR-93	0.025	0.34	0.027	0.29	0.023	0.39	0.027	0.29	0.026	0.32	0.032	0.22	0.031	0.2
miR-193a-3p	-0.049	0.14	-0.046	0.16	-0.05	0.14	-0.048	0.14	-0.049	0.14	-0.039	0.25	-0.04	0.2
ebv-miR-BART14	-0.058	0.1	-0.042	0.22	-0.057	0.1	-0.063	0.065	-0.056	0.11	-0.057	0.11	-0.042	0.2
miR-423-3p	0.039	0.23	0.046	0.16	0.04	0.23	0.048	0.14	0.039	0.24	0.031	0.35	0.04	0.2
miR-339-3p	-0.038	0.21	-0.043	0.15	-0.038	0.21	-0.028	0.35	-0.038	0.21	-0.035	0.25	-0.036	0.21
hsv1-miR-H8	-0.027	0.49	-0.03	0.44	-0.027	0.5	-0.035	0.37	-0.028	0.48	-0.03	0.45	-0.046	0.21
miR-10a	0.025	0.3	0.027	0.26	0.025	0.3	0.017	0.48	0.026	0.3	0.027	0.27	0.029	0.21
hsv2-miR-H4-5p	-0.039	0.26	-0.042	0.21	-0.039	0.26	-0.044	0.19	-0.036	0.29	-0.031	0.37	-0.04	0.21
miR-26b	0.052	0.13	0.045	0.18	0.053	0.13	0.045	0.18	0.053	0.12	0.054	0.12	0.04	0.21
miR-106a_miR-17	0.053	0.036	0.038	0.13	0.052	0.037	0.04	0.11	0.051	0.04	0.059	0.019	0.029	0.21
mcv-miR-M1-5p	0.08	0.028	0.072	0.04	0.079	0.029	0.067	0.059	0.081	0.026	0.072	0.047	0.042	0.22
miR-485-3p	-0.016	0.51	-0.0058	0.81	-0.017	0.49	-0.0043	0.86	-0.013	0.59	-0.044	0.088	-0.03	0.22
miR-891b	0.015	0.67	0.0016	0.96	0.015	0.67	0.02	0.56	0.016	0.64	0.04	0.27	0.041	0.22
miR-324-5p	0.028	0.29	0.032	0.22	0.029	0.28	0.027	0.3	0.027	0.31	0.029	0.27	0.03	0.23
miR-152	0.039	0.25	0.037	0.27	0.041	0.23	0.043	0.2	0.039	0.25	0.033	0.33	0.037	0.24
miR-365	0.046	0.18	0.049	0.14	0.045	0.19	0.038	0.25	0.047	0.17	0.047	0.16	0.037	0.24
miR-26a	0.029	0.32	0.028	0.33	0.029	0.31	0.035	0.21	0.03	0.31	0.025	0.38	0.032	0.24
miR-1266	-0.032	0.34	-0.041	0.21	-0.032	0.34	-0.038	0.24	-0.033	0.32	-0.027	0.42	-0.037	0.24
miR-1225-3p	-0.013	0.66	-0.028	0.33	-0.012	0.68	-0.019	0.5	-0.014	0.63	-0.015	0.61	-0.032	0.24
miR-421	-0.031	0.21	-0.035	0.15	-0.031	0.22	-0.035	0.15	-0.032	0.19	-0.022	0.38	-0.028	0.24
miR-154	0.018	0.46	0.019	0.41	0.019	0.45	0.023	0.34	0.019	0.43	0.018	0.45	0.026	0.24
miR-219-2-3p	0.005	0.88	-0.0089	0.78	0.0025	0.94	-0.0074	0.82	0.0027	0.94	0.014	0.67	-0.037	0.25
miR-451	-1.30E-05	1	0.0015	0.98	0.00048	0.99	0.0061	0.91	-6.00E-04	0.99	0.027	0.61	0.058	0.25
miR-423-5p	0.022	0.38	0.0095	0.7	0.022	0.37	0.016	0.52	0.023	0.36	0.038	0.13	0.028	0.25
miR-374b	0.049	0.091	0.037	0.19	0.049	0.088	0.051	0.071	0.049	0.091	0.042	0.14	0.031	0.25
miR-140-5p	0.022	0.32	0.02	0.34	0.023	0.29	0.026	0.22	0.023	0.3	0.019	0.37	0.023	0.25
miR-548h	-0.023	0.43	-0.027	0.33	-0.023	0.43	-0.027	0.33	-0.025	0.39	-0.024	0.41	-0.031	0.25
miR-151-5p	0.048	0.12	0.043	0.15	0.047	0.13	0.038	0.21	0.046	0.13	0.052	0.091	0.032	0.25
miR-151-3p	0.043	0.19	0.029	0.36	0.042	0.2	0.033	0.3	0.044	0.18	0.051	0.12	0.034	0.26
miR-488	-0.036	0.2	-0.027	0.33	-0.037	0.19	-0.029	0.29	-0.034	0.23	-0.046	0.11	-0.03	0.26
miR-219-5p	0.081	0.14	0.074	0.16	0.08	0.14	0.068	0.21	0.078	0.15	0.11	0.051	0.058	0.26
miR-500_miR-501-5p	0.008	0.79	-0.0035	0.9	0.0081	0.78	0.0015	0.96	0.0054	0.86	0.033	0.29	0.033	0.27
miR-191	0.0093	0.76	0.0097	0.74	0.0096	0.75	0.01	0.73	0.009	0.76	0.018	0.55	0.031	0.27
miR-518e	0.023	0.51	0.013	0.71	0.024	0.5	0.024	0.48	0.023	0.52	0.04	0.27	0.036	0.27
miR-196a	-0.037	0.31	-0.024	0.51	-0.038	0.31	-0.047	0.2	-0.039	0.29	-0.025	0.5	-0.038	0.27
let-7e	-0.0015	0.94	0.011	0.57	-0.0022	0.91	0.0033	0.87	0.00014	0.99	-0.031	0.16	-0.024	0.28
let-7b	-0.035	0.13	-0.043	0.053	-0.035	0.12	-0.034	0.12	-0.034	0.14	-0.015	0.53	-0.024	0.28
miR-382	-0.03	0.33	-0.025	0.39	-0.031	0.31	-0.025	0.4	-0.03	0.33	-0.039	0.2	-0.031	0.28
miR-377	0.018	0.53	0.023	0.42	0.021	0.48	0.027	0.34	0.019	0.52	0.0051	0.86	0.029	0.29
miR-140-3p	0.037	0.17	0.029	0.27	0.036	0.18	0.031	0.23	0.036	0.17	0.046	0.083	0.026	0.3
miR-7	0.042	0.4	0.038	0.44	0.041	0.42	0.042	0.39	0.042	0.4	0.033	0.5	0.049	0.3
miR-1977	0.046	0.2	0.054	0.12	0.045	0.21	0.037	0.29	0.044	0.22	0.064	0.076	0.035	0.3
miR-181c	0.019	0.34	0.016	0.41	0.02	0.32	0.02	0.3	0.018	0.37	0.022	0.27	0.019	0.3
miR-224	-0.043	0.18	-0.039	0.21	-0.043	0.17	-0.043	0.17	-0.043	0.17	-0.036	0.25	-0.03	0.3
miR-30c	0.045	0.16	0.042	0.18	0.046	0.16	0.048	0.13	0.045	0.17	0.033	0.31	0.031	0.3
miR-1305	-0.0052	0.9	-0.0021	0.96	-0.004	0.92	-0.023	0.56	-0.012	0.78	0.044	0.31	0.045	0.31
miR-29c	0.026	0.35	0.032	0.24	0.027	0.33	0.03	0.26	0.027	0.34	0.011	0.69	0.026	0.31
miR-143	-0.034	0.42	-0.026	0.52	-0.032	0.44	-0.031	0.45	-0.032	0.44	-0.049	0.24	-0.039	0.32
miR-31	0.02	0.43	0.034	0.18	0.02	0.43	0.022	0.38	0.019	0.47	0.013	0.61	0.024	0.32
miR-551b	-0.034	0.24	-0.041	0.14	-0.033	0.26	-0.032	0.25	-0.034	0.24	-0.026	0.37	-0.026	0.32
miR-523	-0.04	0.22	-0.036	0.26	-0.04	0.21	-0.047	0.14	-0.043	0.19	-0.029	0.37	-0.029	0.33
miR-144	-0.08	0.1	-0.069	0.15	-0.08	0.11	-0.057	0.24	-0.083	0.095	-0.085	0.085	-0.045	0.33
miR-615-5p	-0.031	0.39	-0.029	0.41	-0.032	0.38	-0.026	0.45	-0.028	0.43	-0.035	0.32	-0.032	0.33
miR-548d-5p	-0.025	0.47	-0.026	0.45	-0.025	0.47	-0.017	0.62	-0.025	0.48	-0.027	0.44	-0.031	0.34
miR-146a	0.022	0.24	0.022	0.24	0.022	0.25	0.019	0.32	0.024	0.21	0.024	0.2	0.017	0.34
miR-453	-0.042	0.19	-0.032	0.31	-0.043	0.19	-0.042	0.18	-0.043	0.18	-0.034	0.3	-0.028	0.35
miR-603	-0.048	0.17	-0.04	0.24	-0.048	0.17	-0.047	0.17	-0.048	0.17	-0.045	0.19	-0.03	0.36
miR-345	0.034	0.23	0.028	0.3	0.035	0.22	0.036	0.19	0.033	0.25	0.026	0.37	0.024	0.36
miR-125b	-0.018	0.63	-0.011	0.76	-0.018	0.63	-0.0058	0.88	-0.019	0.62	-0.046	0.24	-0.033	0.37
miR-520d-3p	-0.016	0.59	-0.019	0.5	-0.016	0.57	-0.022	0.45	-0.014	0.63	-0.021	0.46	-0.024	0.38
miR-27b	-0.011	0.48	-0.012	0.39	-0.011	0.48	-0.013	0.39	-0.01	0.49	-0.0064	0.67	-0.012	0.38
miR-9	-0.01	0.73	-0.019	0.49	-0.0091	0.76	-0.0016	0.96	-0.0096	0.74	-0.026	0.39	-0.024	0.39
miR-548j	-0.017	0.61	-0.027	0.39	-0.017	0.61	-0.018	0.58	-0.016	0.63	-0.019	0.55	-0.026	0.39
miR-361-5p	-0.015	0.57	-0.01	0.69	-0.015	0.57	-0.0098	0.71	-0.013	0.62	-0.031	0.26	-0.022	0.39
miR-208a	-0.028	0.41	-0.023	0.48	-0.029	0.39	-0.022	0.51	-0.027	0.42	-0.026	0.43	-0.027	0.4
miR-708	-0.014	0.62	-0.0086	0.76	-0.013	0.66	7.40E-05	1	-0.013	0.65	1.10E-05	1	0.022	0.42
miR-1185	0.0045	0.87	0.0083	0.76	0.005	0.86	0.0091	0.74	0.0039	0.89	-0.018	0.53	-0.021	0.43
miR-542-3p	-0.032	0.33	-0.028	0.39	-0.031	0.35	-0.029	0.36	-0.031	0.34	-0.036	0.28	-0.024	0.43
miR-331-3p	-0.004	0.88	-0.0013	0.96	-0.005	0.86	0.0086	0.75	-0.0032	0.91	-0.025	0.39	-0.021	0.43
miR-98	0.038	0.24	0.04	0.21	0.039	0.23	0.032	0.31	0.036	0.26	0.025	0.44	0.023	0.43
miR-197	-0.011	0.77	-0.018	0.63	-0.012	0.75	-0.0092	0.81	-0.011	0.76	-0.017	0.65	-0.028	0.43
miR-934	-0.019	0.55	-0.0095	0.76	-0.019	0.54	-0.027	0.39	-0.021	0.52	-0.018	0.57	-0.023	0.44
hsv1-miR-H1	-0.055	0.11	-0.05	0.13	-0.056	0.1	-0.055	0.099	-0.055	0.11	-0.037	0.28	-0.025	0.44
miR-515-3p	-0.032	0.34	-0.021	0.52	-0.032	0.34	-0.04	0.22	-0.033	0.31	-0.028	0.4	-0.023	0.44
miR-153	0.023	0.52	0.021	0.55	0.026	0.48	0.03	0.4	0.022	0.55	0.015	0.67	0.025	0.46
miR-222	-0.023	0.38	-0.014	0.6	-0.023	0.39	-0.021	0.42	-0.024	0.37	-0.03	0.25	-0.019	0.46
miR-220a	0.035	0.25	0.029	0.34	0.036	0.24	0.024	0.43	0.033	0.28	0.033	0.28	0.021	0.47
miR-15a	0.016	0.51	0.0094	0.68	0.016	0.49	0.017	0.46	0.015	0.54	0.011	0.65	0.015	0.48
miR-563	-0.014	0.57	-0.017	0.47	-0.014	0.56	-0.0058	0.81	-0.012	0.62	-0.023	0.36	-0.016	0.48
miR-525-5p	-0.0084	0.79	-0.012	0.69	-0.0076	0.81	-0.012	0.69	-0.0094	0.77	0.0083	0.8	0.021	0.49
miR-574-3p	0.017	0.62	0.0094	0.78	0.016	0.64	0.0061	0.86	0.016	0.63	0.012	0.73	-0.022	0.49
miR-135b	-0.0075	0.81	-0.013	0.66	-0.0062	0.84	0.0031	0.92	-0.009	0.77	-0.013	0.68	-0.02	0.49
miR-566	0.027	0.44	0.032	0.36	0.026	0.45	0.025	0.46	0.025	0.48	0.03	0.39	0.022	0.5
miR-491-3p	-0.0017	0.96	0.017	0.59	-0.0026	0.94	0.0033	0.92	-0.0016	0.96	-0.0084	0.8	0.021	0.5
miR-328	-0.007	0.79	0.0034	0.89	-0.0068	0.8	-0.0022	0.93	-0.0068	0.8	0.00091	0.97	0.017	0.5
miR-548b-3p	0.022	0.54	0.018	0.6	0.024	0.5	0.019	0.59	0.021	0.55	0.026	0.46	0.022	0.5
miR-183	-0.02	0.51	-0.018	0.55	-0.02	0.53	-0.017	0.57	-0.017	0.58	-0.033	0.3	-0.019	0.5
miR-362-5p	-0.018	0.53	-0.015	0.58	-0.018	0.51	-0.017	0.54	-0.016	0.56	-0.012	0.66	-0.017	0.5
miR-181a	0.004	0.86	-0.014	0.54	0.0025	0.91	0.00039	0.99	0.0019	0.93	0.019	0.4	-0.014	0.51
ebv-miR-BART2-5p	0.04	0.23	0.036	0.27	0.039	0.24	0.029	0.37	0.038	0.26	0.036	0.27	0.02	0.52
miR-190b	0.045	0.15	0.026	0.4	0.043	0.16	0.039	0.21	0.043	0.17	0.057	0.068	0.019	0.52
kshv-miR-K12-9	0.03	0.36	0.02	0.53	0.031	0.35	0.024	0.45	0.033	0.32	0.034	0.3	0.019	0.52
miR-520d-5p_miR-527_miR-518a-5p	-0.023	0.51	-0.022	0.52	-0.022	0.52	-0.024	0.47	-0.019	0.57	-0.016	0.64	-0.02	0.53
miR-20a_miR-20b	0.011	0.63	0.01	0.64	0.0097	0.66	0.0087	0.69	0.0095	0.67	0.022	0.32	0.013	0.53
miR-409-5p	-0.029	0.33	-0.011	0.71	-0.03	0.31	-0.029	0.32	-0.03	0.31	-0.035	0.24	-0.017	0.53
let-7g	0.015	0.55	0.015	0.54	0.016	0.54	0.02	0.41	0.014	0.58	0.0032	0.9	0.015	0.53
miR-378	0.016	0.56	0.013	0.65	0.015	0.59	0.013	0.65	0.019	0.5	0.028	0.33	0.017	0.54
miR-199a-3p_miR-199b-3p	-0.001	0.97	-0.0052	0.86	-0.0014	0.96	-0.0075	0.8	-0.00062	0.98	-0.0079	0.8	-0.018	0.54
miR-135a	-0.025	0.46	-0.026	0.43	-0.025	0.47	-0.014	0.68	-0.023	0.5	-0.032	0.35	-0.02	0.54
miR-363	0.0026	0.92	-0.01	0.69	0.0015	0.95	-0.0066	0.8	0.0026	0.92	0.0058	0.82	-0.015	0.54
kshv-miR-K12-4-5p	-0.023	0.49	-0.02	0.55	-0.023	0.49	-0.024	0.46	-0.022	0.51	-0.023	0.5	-0.019	0.54
miR-125a-5p	0.0096	0.67	0.026	0.24	0.0082	0.72	0.014	0.52	0.011	0.63	-0.019	0.45	-0.015	0.54
miR-452	-0.003	0.93	0.006	0.85	-0.0031	0.93	-0.0037	0.91	-0.0059	0.86	0.011	0.75	0.019	0.54
miR-30a	0.0038	0.87	-0.003	0.9	0.0059	0.81	0.0084	0.72	0.0036	0.88	0.0091	0.7	0.013	0.55
miR-487b	-0.01	0.72	-0.003	0.92	-0.0099	0.73	-0.0056	0.84	-0.0078	0.79	-0.023	0.43	-0.016	0.56
miR-491-5p	-0.028	0.36	-0.016	0.58	-0.028	0.35	-0.024	0.43	-0.024	0.42	-0.036	0.23	-0.017	0.56
miR-548a-5p	-0.048	0.12	-0.032	0.29	-0.05	0.11	-0.036	0.24	-0.046	0.14	-0.049	0.11	-0.017	0.56
miR-889	0.0061	0.85	0.0088	0.79	0.0068	0.84	0.021	0.52	0.0054	0.87	0.0058	0.86	0.018	0.56
miR-15b	-0.0026	0.92	0.0089	0.74	-0.0031	0.91	-0.0086	0.74	-0.0033	0.9	0.0039	0.88	0.014	0.56
miR-370	-0.013	0.67	-0.0012	0.97	-0.015	0.63	-0.0021	0.95	-0.013	0.68	-0.022	0.49	-0.017	0.57
miR-627	0.0049	0.88	-0.004	0.9	0.0034	0.92	0.0023	0.94	0.0051	0.88	0.025	0.46	0.017	0.58
let-7a	0.026	0.42	0.035	0.26	0.026	0.42	0.028	0.37	0.025	0.43	0.0071	0.83	0.017	0.58
miR-543	-0.0098	0.7	0.0011	0.97	-0.01	0.68	-0.0048	0.85	-0.0076	0.77	-0.025	0.34	-0.014	0.58
miR-660	0.038	0.14	0.03	0.23	0.038	0.14	0.034	0.18	0.038	0.15	0.032	0.21	0.013	0.58
miR-548f	-0.022	0.59	-0.018	0.65	-0.022	0.59	-0.033	0.41	-0.02	0.62	-0.021	0.6	-0.021	0.58
miR-876-3p	0.003	0.91	-0.0068	0.79	0.0035	0.89	-0.00053	0.98	0.0044	0.87	-0.0024	0.92	-0.013	0.59
ebv-miR-BART16	-0.031	0.37	-0.035	0.31	-0.031	0.38	-0.028	0.41	-0.032	0.36	-0.026	0.45	-0.017	0.59
miR-30b	0.028	0.3	0.025	0.35	0.03	0.28	0.035	0.19	0.028	0.3	0.013	0.64	0.014	0.59
miR-337-3p	0.025	0.4	0.022	0.44	0.026	0.38	0.024	0.41	0.026	0.39	0.021	0.48	0.015	0.59
miR-299-5p	-0.0071	0.83	-3.00E-04	0.99	-0.0056	0.86	0.002	0.95	-0.0056	0.86	-0.014	0.67	0.016	0.6
miR-27a	0.023	0.56	0.02	0.61	0.024	0.55	0.016	0.68	0.025	0.53	0.019	0.63	0.019	0.6
miR-450a	0.0018	0.95	0.00042	0.99	0.004	0.9	5.00E-04	0.99	0.0016	0.96	-0.013	0.67	-0.015	0.61
miR-770-5p	-0.01	0.74	-0.018	0.54	-0.011	0.73	-0.0097	0.74	-0.0085	0.78	0.013	0.69	0.015	0.61
miR-769-3p	-0.0094	0.77	-0.0074	0.81	-0.01	0.76	0.0014	0.97	-0.0095	0.77	-0.019	0.56	-0.015	0.62
miR-199b-5p	-0.013	0.7	-0.013	0.7	-0.016	0.63	-0.0036	0.91	-0.015	0.67	-0.014	0.69	-0.016	0.62
miR-107	0.012	0.64	0.015	0.55	0.012	0.64	0.018	0.47	0.011	0.67	-0.012	0.64	-0.012	0.64
miR-639	-0.021	0.54	-0.028	0.41	-0.019	0.58	-0.031	0.36	-0.023	0.5	-0.0046	0.89	-0.015	0.64
miR-767-5p	-0.021	0.48	-0.019	0.52	-0.021	0.49	-0.021	0.47	-0.022	0.45	-0.021	0.48	-0.013	0.65
miR-1283	0.014	0.58	0.016	0.49	0.013	0.59	0.0066	0.78	0.012	0.63	0.021	0.4	0.01	0.65
miR-496	-0.023	0.43	-0.019	0.5	-0.021	0.46	-0.011	0.7	-0.021	0.46	-0.021	0.46	-0.012	0.65
miR-326	-0.02	0.56	-0.016	0.63	-0.02	0.55	-0.021	0.51	-0.019	0.56	-0.015	0.65	-0.014	0.66
ebv-miR-BART9	-0.041	0.2	-0.048	0.12	-0.04	0.21	-0.029	0.34	-0.04	0.2	-0.023	0.46	-0.013	0.66
hcmv-miR-UL70-3p	0.015	0.64	0.014	0.65	0.016	0.62	0.0045	0.89	0.014	0.66	0.021	0.51	0.013	0.67
miR-10b	0.018	0.58	0.015	0.63	0.017	0.6	0.026	0.42	0.014	0.66	0.018	0.57	0.013	0.67
miR-361-3p	-0.0074	0.73	-0.0092	0.66	-0.0069	0.75	-0.0076	0.71	-0.0064	0.76	-0.0065	0.76	-0.0083	0.68
miR-499-5p	0.011	0.68	0.0067	0.79	0.011	0.67	0.013	0.6	0.01	0.69	0.003	0.91	-0.0098	0.68
miR-320c	0.012	0.73	0.025	0.48	0.012	0.74	-0.0025	0.94	0.011	0.75	0.022	0.54	0.014	0.68
miR-148a	-0.0017	0.95	0.00043	0.99	-0.0028	0.92	0.0035	0.9	-0.00053	0.99	-0.011	0.71	-0.011	0.69
miR-296-5p	0.018	0.5	0.014	0.59	0.017	0.52	0.026	0.32	0.017	0.53	0.015	0.58	0.0098	0.69
let-7f	0.0054	0.85	0.013	0.63	0.005	0.86	0.0061	0.83	0.006	0.84	-0.017	0.56	-0.011	0.69
miR-522	0.015	0.68	0.019	0.59	0.012	0.73	0.012	0.73	0.0096	0.79	0.014	0.7	0.013	0.7
miR-374a	0.018	0.63	0.012	0.74	0.019	0.63	0.023	0.55	0.02	0.61	0.011	0.78	0.013	0.72
miR-329	-0.016	0.55	-0.0081	0.75	-0.016	0.55	-0.0056	0.83	-0.015	0.58	-0.021	0.42	-0.0089	0.72
miR-600	-0.0061	0.84	0.0011	0.97	-0.0077	0.8	-0.004	0.89	-0.0066	0.83	0.002	0.95	0.0098	0.73
miR-526a_miR-518d-5p_miR-520c-5p	-0.0064	0.83	0.0015	0.96	-0.0066	0.83	-0.015	0.6	-0.0052	0.86	-0.0075	0.8	-0.0093	0.74
miR-142-3p	0.0043	0.9	0.009	0.79	0.0049	0.89	0.013	0.69	0.0051	0.88	-0.0098	0.77	0.011	0.74
miR-92b	0.057	0.056	0.062	0.033	0.054	0.078	0.059	0.044	0.059	0.049	0.025	0.42	0.01	0.74
miR-95	0.0039	0.86	0.0055	0.8	0.0033	0.88	0.01	0.65	0.0044	0.85	-0.0015	0.95	0.0069	0.74
miR-122	0.00031	0.99	0.0027	0.87	0.00048	0.98	0.00069	0.97	0.00022	0.99	-0.01	0.56	-0.0053	0.74
miR-1308	-0.035	0.37	-0.05	0.19	-0.035	0.36	-0.049	0.19	-0.041	0.29	0.03	0.51	0.014	0.74
miR-148b	-0.0073	0.72	-0.014	0.49	-0.007	0.73	-0.0071	0.72	-0.0082	0.68	-0.008	0.69	-0.0061	0.75
miR-640	-0.022	0.48	-0.022	0.46	-0.021	0.48	-0.028	0.35	-0.022	0.48	-0.012	0.69	-0.0091	0.75
miR-651	-0.0099	0.75	-0.0057	0.85	-0.0098	0.75	-0.01	0.74	-0.009	0.77	-0.0051	0.87	0.009	0.75
miR-490-5p	0.0044	0.88	0.006	0.84	0.0046	0.88	0.00062	0.98	0.009	0.77	0.013	0.67	0.0088	0.75
miR-455-3p	0.0064	0.81	0.0029	0.91	0.0056	0.83	0.0073	0.78	0.006	0.82	0.0065	0.81	0.0079	0.75
miR-495	-0.0026	0.93	0.002	0.94	-0.0029	0.92	-0.00061	0.98	-0.0011	0.97	-0.019	0.54	-0.0087	0.76
miR-188-5p	-0.00024	0.99	0.0013	0.97	-0.0015	0.96	-0.0019	0.95	-0.0014	0.96	0.013	0.69	0.0091	0.76
miR-21	0.018	0.61	0.0087	0.8	0.019	0.59	0.013	0.7	0.02	0.57	0.025	0.46	0.01	0.76
miR-544	0.0073	0.81	0.0074	0.81	0.0073	0.81	-0.0035	0.91	0.0044	0.89	0.021	0.5	0.0086	0.77
ebv-miR-BART6-5p	-0.012	0.71	-0.005	0.87	-0.012	0.7	-0.018	0.56	-0.013	0.68	-0.0056	0.86	-0.0086	0.77
miR-22	0.0054	0.81	0.00082	0.97	0.0052	0.81	0.0064	0.77	0.0065	0.77	0.0025	0.91	-0.006	0.77
miR-103	0.0092	0.72	0.016	0.52	0.0095	0.71	0.013	0.61	0.01	0.69	-0.015	0.57	-0.0073	0.77
miR-136	-0.014	0.67	-0.0066	0.84	-0.014	0.68	-0.0077	0.82	-0.015	0.66	-0.0099	0.77	0.0088	0.78
miR-34b	-0.0055	0.87	0.00067	0.98	-0.0069	0.84	-0.013	0.69	-0.0069	0.84	-0.0028	0.93	-0.0086	0.78
miR-1979	0.014	0.71	0.015	0.69	0.012	0.75	-0.0071	0.85	0.017	0.66	0.044	0.26	0.01	0.79
miR-1248	-0.0075	0.82	-0.02	0.53	-0.008	0.81	-0.0021	0.95	-0.0099	0.76	-0.0031	0.92	-0.0079	0.79
miR-383	0.004	0.84	0.0012	0.95	0.0029	0.89	0.0067	0.73	0.0046	0.82	0.0049	0.8	0.0047	0.8
miR-340	-0.00089	0.97	-0.01	0.71	-0.001	0.97	0.007	0.8	0.0015	0.96	-0.0063	0.82	-0.0064	0.8
miR-124	0.023	0.51	0.021	0.54	0.024	0.5	0.019	0.59	0.024	0.49	0.017	0.64	0.0081	0.8
kshv-miR-K12-2	0.019	0.57	0.0084	0.8	0.019	0.57	0.011	0.75	0.018	0.59	0.026	0.46	0.0077	0.81
miR-448	-0.0075	0.81	-0.014	0.63	-0.0083	0.79	0.0015	0.96	-0.0069	0.82	-0.013	0.66	-0.0068	0.81
miR-514	0.0045	0.9	0.0078	0.82	0.0044	0.9	0.0047	0.89	0.0067	0.85	0.0066	0.85	0.008	0.81
miR-369-3p	-0.0056	0.84	2.00E-04	0.99	-0.0051	0.86	-0.007	0.8	-0.0056	0.84	-0.018	0.52	-0.0064	0.81
miR-125a-3p	-0.0013	0.97	-0.0018	0.95	-0.0012	0.97	-0.013	0.66	-0.0032	0.92	0.0059	0.84	-0.0063	0.82
miR-150	0.0047	0.85	-0.015	0.55	0.0058	0.82	0.00094	0.97	0.0036	0.89	0.013	0.61	-0.0052	0.83
miR-204	0.018	0.59	0.014	0.66	0.02	0.56	0.015	0.66	0.017	0.62	0.014	0.68	0.0067	0.83
miR-146b-5p	-0.0024	0.93	-0.012	0.66	-0.0023	0.93	-1.90E-05	1	-0.0026	0.93	0.0059	0.84	0.0055	0.84
miR-324-3p	0.0056	0.79	-0.0017	0.93	0.0059	0.78	0.0097	0.63	0.0056	0.79	0.0068	0.74	0.0036	0.85
miR-223	0.004	0.91	0.0012	0.97	0.0072	0.83	-0.004	0.91	0.003	0.93	0.0031	0.93	0.0055	0.86
miR-1	0.031	0.33	0.03	0.33	0.032	0.31	0.024	0.44	0.029	0.36	0.016	0.61	0.0048	0.87
miR-577	0.013	0.67	0.0054	0.86	0.012	0.7	0.013	0.66	0.0097	0.75	0.017	0.59	-0.0042	0.89
miR-758	-0.013	0.7	-1.50E-05	1	-0.014	0.67	-0.0065	0.84	-0.012	0.71	-0.02	0.55	-0.0043	0.89
miR-539	-0.0087	0.62	-0.0064	0.7	-0.0086	0.62	-0.0039	0.82	-0.0065	0.71	-0.012	0.48	-0.0019	0.91
miR-655	-0.017	0.47	-0.011	0.65	-0.016	0.51	-0.017	0.47	-0.015	0.53	-0.018	0.44	0.0026	0.91
miR-769-5p	-0.0055	0.86	-0.0044	0.88	-0.0059	0.85	-0.0083	0.78	-0.003	0.92	-0.0045	0.88	-0.0032	0.91
miR-133a	0.01	0.7	0.022	0.4	0.01	0.71	0.0054	0.83	0.0092	0.73	0.0068	0.8	0.0014	0.95
miR-128	0.015	0.68	0.0055	0.88	0.015	0.68	0.011	0.76	0.015	0.67	0.0063	0.86	-0.0018	0.96
miR-580	-0.0014	0.97	-0.0085	0.79	-0.0014	0.97	-0.0028	0.93	-0.00052	0.99	0.00077	0.98	0.0015	0.96
miR-200b	0.018	0.54	0.015	0.61	0.018	0.56	0.011	0.72	0.014	0.65	0.014	0.65	0.0013	0.96
miR-1286	-0.003	0.93	-0.0043	0.9	-0.0031	0.93	0.0018	0.96	-0.003	0.93	-0.0024	0.94	-0.0013	0.97
miR-2054	-0.0034	0.92	-0.011	0.76	-0.0028	0.94	0.00092	0.98	-0.0029	0.94	-0.0031	0.93	-0.00095	0.98
miR-155	-0.0041	0.88	-0.00072	0.98	-0.0028	0.92	-0.016	0.56	-0.004	0.88	0.0032	0.91	-0.00053	0.98
miR-139-5p	-0.01	0.64	-0.0096	0.66	-0.011	0.62	0.0016	0.94	-0.009	0.69	-0.016	0.48	-0.00043	0.98
hcmv-miR-US5-2	0.01	0.77	0.0074	0.82	0.0089	0.79	0.0035	0.92	0.011	0.75	0.014	0.67	0.00059	0.98
miR-626	0.013	0.66	0.016	0.59	0.012	0.68	-0.00015	1	0.014	0.65	0.014	0.63	0.00046	0.99
miR-487a	0.0073	0.8	0.018	0.53	0.0075	0.8	0.018	0.52	0.0093	0.75	-0.013	0.67	-0.00046	0.99
miR-30d	0.0079	0.72	0.01	0.63	0.0078	0.72	0.0074	0.73	0.0092	0.68	-0.00085	0.97	-0.00031	0.99
miR-362-3p	-0.0037	0.9	-0.0055	0.84	-0.0031	0.91	-0.003	0.91	-0.0034	0.9	-0.0053	0.85	-0.00036	0.99
miR-516a-3p	0.0021	0.95	-0.0027	0.94	0.0036	0.92	-0.0044	0.9	9.30E-05	1	0.0064	0.85	0.00031	0.99
miR-300	-0.005	0.88	-0.0037	0.91	-0.0067	0.84	-0.001	0.98	-0.0058	0.86	0.00089	0.98	3.10E-05	1
